# Supplementary material for: Covariate selection and adjustment for efficacy and safety endpoints in indirect comparative effectiveness analyses of CAR-T-cell therapies for large B-cell lymphoma: a systematic review
Source: Atypon-hosted journal article supplement (doi:10.57264/cer-2026-0033), 2026-06-26
Supplement: supplementary data.docx [file supplementary%20data.docx]

Supplementary Table 1: Embase Search Strategy

| **#** | **Search in EMBASE** | Ergebnis |
| --- | --- | --- |
| #1 | ('lymphoma'/exp OR 'lymphoma') AND 'large' AND ('b cell'/exp OR 'b cell') AND 'diffuse' OR 'large b cell lymphoma'/exp OR 'large b cell lymphoma' OR 'dlbcl'/exp OR 'dlbcl' OR 'dlbcls' OR 'lbcl' OR 'diffuse lymphoma'/exp OR 'diffuse lymphoma' OR 'diffuse large b cell lymphoma'/exp OR 'diffuse large b cell lymphoma' OR 'b cell lymphoma'/exp OR 'b cell lymphoma' | 183461 |
| #2 | 'car t' OR 'chimeric antigen receptor t cell therap*' OR 'adoptive immunotherapy'/exp OR 'adoptive immunotherapy' OR 'tisacel' OR 'tisa-cel' OR 'tisagenlecleucel'/exp OR 'tisagenlecleucel' OR 'kymriah'/exp OR 'kymriah' OR 'axicel' OR 'axi-cel'/exp OR 'axi-cel' OR 'axicabtagene ciloleucel'/exp OR 'axicabtagene ciloleucel' OR 'yescarta'/exp OR 'yescarta' OR ('lisocabtagene' AND 'maraleucel') OR 'lisocel' OR 'liso-cel'/exp OR 'liso-cel' OR 'breyanzi'/exp OR 'breyanzi' OR 'lisocabtagene maraleucel'/exp OR 'lisocabtagene maraleucel' | 78349 |
| #3 | 'indirect comparison*' OR ('indirect' AND 'comparison*') OR 'itc' OR 'treatment comparison*' OR (('treatment'/exp OR 'treatment') AND 'comparison*') OR 'simulated treatment comparison*' OR 'stc' OR 'network meta analys*' OR 'nma' OR 'adjusted comparison*' OR ('adjusted' AND 'comparison*') OR 'matching adjusted indirect comparison*' OR 'maic' OR 'comparing efficacy' OR ('bucher*' AND 'comparison*') OR ('bayesian*' AND 'comparison*') OR 'real world comparison*' OR 'comparative efficacy' OR (('comparative' OR 'comparing') AND ('efficacy'/exp OR 'efficacy')) OR 'network meta analysis (topic)'/exp OR 'network meta analysis (topic)' OR (('network'/exp OR 'network' OR 'network s' OR 'networked' OR 'networker' OR 'networkers' OR 'networking' OR 'networks') AND ('meta analysis (topic)'/exp OR 'meta analysis (topic)')) OR (('propensity' AND ('score'/exp OR 'score') OR 'propensity score'/exp OR 'propensity score') AND ('match' OR 'matched' OR 'matches' OR 'matching' OR 'matchings')) OR 'propensity score'/exp OR 'propensity score' | 1434821 |
| #4 | #1 AND #2 AND #3 | 1222 |
| #5 | #4 NOT ('conference abstract'/it OR 'conference paper'/it OR 'conference review'/it OR 'data papers'/it OR 'editorial'/it OR 'erratum'/it OR 'letter'/it OR 'note'/it OR 'short survey'/it OR 'clinical trial'/it) | 394 |
| #6 | #5 NOT [animals]/lim | 400 |
| #7 | #6 AND ([english]/lim OR [german]/lim) | 374 |

Supplementary Table 2: Chochrane Central Search Strategy

| **#** | **Search in Chochrane Central** | **Results** |
| --- | --- | --- |
| #1 | diffuse large b-cell lymphoma OR "large B-cell lymphoma" OR "dlbcl" OR "dlbcls" OR "LBCL" | 2173 |
| #2 | MeSH descriptor: [Lymphoma, Large B-Cell, Diffuse] explode all trees | 705 |
| #3 | MeSH descriptor: [Lymphoma, B-Cell] explode all trees | 1142 |
| #4 | (("CAR T") OR ("CAR-T")) OR "chimeric antigen receptor T-cell NEXT therap" OR (tisagenlecleucel) OR (tisa-cel) OR (tisacel) OR (tisa NEXT cel) OR (Kymriah) OR (axicabtagene* NEXT ciloleucel) OR ("axicabtagene ciloleucel") OR “axi-cel” OR axicel OR (axi NEXT cel) OR (Yescarta) OR ("lisocabtagene maraleucel") OR (lisocabtagene maraleucel) OR (liso-cel) OR (lisocel) OR (liso NEXT cel) OR (Breyanzi) | 600 |
| #5 | MeSH descriptor: [Immunotherapy, Adoptive] explode all trees | 212 |
| #6 | (("indirect NEXT comparison") OR ("indirect" NEXT "comparison")) OR (("treatment" AND "comparison")) OR "simulated treatment NEXT comparison" OR STC OR "network meta NEXT analys" OR "network-meta NEXT analys" OR NMA OR "adjusted NEXT comparison" OR (("adjusted" NEXT "comparison")) OR "matching adjusted indirect NEXT comparison" OR "comparing efficacy" OR "real world NEXT comparison" OR "comparative efficacy" | 140415 |
| #7 | MeSH descriptor: [Network Meta-Analysis] explode all trees | 45 |
| #8 | MeSH descriptor: [Network Meta-Analysis as Topic] explode all trees | 17 |
| #9 | MeSH descriptor: [Propensity Score] explode all trees | 782 |
| #10 | (#1 OR #2 OR #3) AND (#4 OR #5) AND (#6 OR #7 OR #8 OR #9) | 21 |
|  | in trials | 19 |
|  | in reviews | 1 |
|  | in protocols | 1 |

Supplementary Table 3: List of Excluded Studies

| Study |
| --- |
| 1. AVIVI, I., PERRY, C., SEGMAN, Y., AMIT, O., BAR-ON, Y., KATZ, O. B., GOLD, R., RIBAKOVSKY, E., AVIGDOR, A., VAINSTEIN, V., GOLDSCHMIDT, N., RINGELSTEIN-HARLEV, S., HOROWITZ, N. A., GUTWEIN, O., GURION, R., ITCHAKI, G., ABADI, U., NEMETS, A., SOFER, O., VEZKER, M., TADMOR, T., DALLY, N., FILANOVSKY, K., LEIBA, M., SARID, N., BENYAMINI, N., LUTTWAK, E., HERISHANU, Y. & RAM, R. 2022. Polatuzumab-based regimen or CAR T cell for patients with refractory/relapsed DLBCL-a matched cohort analysis. Ann Hematol, 101, 755-762. |
| 2. BACHY, E., LE GOUILL, S., DI BLASI, R., SESQUES, P., MANSON, G., CARTRON, G., BEAUVAIS, D., ROULIN, L., GROS, F. X., RUBIO, M. T., BORIES, P., BAY, J. O., LLORENTE, C. C., CHOQUET, S., CASASNOVAS, R. O., MOHTY, M., GUIDEZ, S., JORIS, M., LOSCHI, M., CARRAS, S., ABRAHAM, J., CHAUCHET, A., DRIEU LA ROCHELLE, L., DEAU-FISCHER, B., HERMINE, O., GASTINNE, T., TUDESQ, J. J., GAT, E., BROUSSAIS, F., THIEBLEMONT, C., HOUOT, R. & MORSCHHAUSER, F. 2022. A real-world comparison of tisagenlecleucel and axicabtagene ciloleucel CAR T cells in relapsed or refractory diffuse large B cell lymphoma. Nat Med, 28, 2145-2154. |
| 3. BASTOS-OREIRO, M., DE LAS HERAS, A., PRESA, M., CASADO, M. A., PARDO, C., MARTÍN-ESCUDERO, V. & SUREDA, A. 2022. Cost-Effectiveness Analysis of Axicabtagene Ciloleucel vs. Tisagenlecleucel for the Management of Relapsed/Refractory Diffuse Large B-Cell Lymphoma in Spain. Cancers (Basel), 14. |
| 4. CHRISTODOULOU, I., COOPER, K., GAO, V., MCFARQUHAR, A., DORRITIE, K. & SHLOMCHIK, W. 2025. Comparative Analysis of Lymphodepletion Regimens in CART-19 Treatment for Relapsed/Refractory Diffuse Large B Cell Lymphoma. Transplant Cell Ther. |
| 5. DESCHÊNES-SIMARD, X., BROMBERG, M., DEVLIN, S. M., GONEN, M., BEYAR-KATZ, O., IP, A., MARCUS, R., AVIGDOR, A., BALLWEG, A., RABINOVICH, E., ALHOMOUD, M., RIVAS DELGADO, A., CORONA DE LAPUERTA, M., LUNA DE ABIA, A., PALOMBA, M. L., SHAH, G. L., LIN, R., BOARDMAN, A. P., FALCHI, L., LUE, J., SALLES, G., PERALES, M. A., SHOUVAL, R., DAHI, P. B. & SCORDO, M. 2025. Comparative real-world outcomes of CD19-directed CAR T-cell therapies in large B-cell lymphoma. Blood Adv, 9, 5571-5584. |
| 6. FURQAN, F., AHN, K. W., KAUR, M., PATEL, J., ANSELL, S., AWAN, F. T., BAIRD, J., BEZERRA, E., FAROOQ, U., FUNG, H., KHURANA, A., LEKAKIS, L., LUTFI, F., MCCARTY, J., MUKHERJEE, A., NATH, R., ROMANCIK, J., SCHUSTER, S. J., SMITH, M., WINTER, A., TURTLE, C., SAUTER, C., SHADMAN, M., HERRARA, A. & HAMADANI, M. 2025. Autologous Transplant or CAR-T as Consolidation Options in MYC Rearranged Large B-Cell Lymphoma Patients in Remission After Salvage Treatments. Am J Hematol, 100, 1152-1162. |
| 7. GALLI, E., DI BLASI, R., DI ROCCO, A., CRISTINELLI, C., PANSINI, I., BOMMIER, C., CORRENTE, A., DE BERNARDIS, I., VISCOVO, M., HOHAUS, S., MODONI, A., SORÀ, F., CHIUSOLO, P., MARTELLI, M., SICA, S. & THIEBLEMONT, C. 2025. Routine prophylaxis with levetiracetam offers no benefit in CD19 CAR-T for LBCL: a multicenter propensity-matched study. Blood Adv, 9, 5501-5509. |
| 8. GAUTHIER, J., GAZEAU, N., HIRAYAMA, A. V., HILL, J. A., WU, V., CEARLEY, A., PERKINS, P., KIRK, A., SHADMAN, M., CHOW, V. A., GOPAL, A. K., HODGES DWINAL, A., WILLIAMSON, S., MYERS, J., CHEN, A., NAGLE, S., HAYES-LATTIN, B., SCHACHTER, L., MALONEY, D. G., TURTLE, C. J., SORROR, M. L. & MAZIARZ, R. T. 2022. Impact of CD19 CAR T-cell product type on outcomes in relapsed or refractory aggressive B-NHL. Blood, 139, 3722-3731. |
| 9. HAYASHINO, K., TERAO, T., NISHIMORI, H., KITAMURA, W., KOBAYASHI, H., KAMOI, C., SEIKE, K., FUJIWARA, H., ASADA, N., ENNISHI, D., FUJII, K., FUJII, N., MATSUOKA, K. I. & MAEDA, Y. 2025. Outcomes of allogeneic SCT versus tisagenlecleucel in patients with R/R LBCL and poor prognostic factors. Int J Hematol, 121, 232-243. |
| 10. HILLIS, C., VICENTE, C. & BALL, G. 2022. The Cost Effectiveness of Axicabtagene Ciloleucel Versus Best Supportive Care in the Treatment of Adult Patients with Relapsed or Refractory Large B-Cell Lymphoma (LBCL) After Two or More Lines of Systemic Therapy in Canada. Pharmacoeconomics, 40, 917-928. |
| 11. IACOBONI, G., NAVARRO, V., MARTÍN-LÓPEZ, A., REJESKI, K., KWON, M., JALOWIEC, K. A., AMAT, P., REGUERA-ORTEGA, J. L., GALLUR, L., BLUMENBERG, V., GUTIÉRREZ-HERRERO, S., RODDIE, C., BENZAQUÉN, A., DELGADO-SERRANO, J., SÁNCHEZ-SALINAS, M. A., BAILÉN, R., CARPIO, C., LÓPEZ-CORRAL, L., HERNANI, R., BASTOS, M., O'REILLY, M., MARTÍN-MARTÍN, L., SUBKLEWE, M. & BARBA, P. 2024. Recent Bendamustine Treatment Before Apheresis Has a Negative Impact on Outcomes in Patients With Large B-Cell Lymphoma Receiving Chimeric Antigen Receptor T-Cell Therapy. J Clin Oncol, 42, 205-217. |
| 12. JAIN, M. D., JACOBS, M. T., GAO, F., NASTOUPIL, L. J., SPIEGEL, J. Y., LIN, Y., DAHIYA, S., LUNNING, M., LEKAKIS, L., REAGAN, P., OLUWOLE, O., MCGUIRK, J., DEOL, A., SEHGAL, A. R., GOY, A., HILL, B. T., ANDREADIS, C., MUNOZ, J., CHAVEZ, J. C., BENNANI, N. N., RAPOPORT, A. P., VOSE, J. M., MIKLOS, D., NEELAPU, S. S., LOCKE, F. L. & GHOBADI, A. 2024. Bridging therapy with axicabtagene ciloleucel for large B-cell lymphoma: results from the US Lymphoma CAR-T Consortium. Blood Adv, 8, 1042-1050. |
| 13. JALLOUK, A. P., KUI, N., SUN, R., WESTIN, J. R., STEINER, R. E., NAIR, R., NASTOUPIL, L. J., FAYAD, L. E., ZAKI, A. A., HAWKINS, M., ADKINS, S., NOORANI, M., DAS, K., HENDERSON, J., SHPALL, E. J., KEBRIAEI, P., RAMDIAL, J., FLOWERS, C. R., NEELAPU, S. S., AHMED, S. & STRATI, P. 2024. Effect of delayed cell infusion in patients with large B-cell lymphoma treated with chimeric antigen receptor T-cell therapy. Haematologica, 109, 1460-1468. |
| 14. LIU, R., OLUWOLE, O. O., DIAKITE, I., BOTTEMAN, M. F., SNIDER, J. T. & LOCKE, F. L. 2021. Cost effectiveness of axicabtagene ciloleucel versus tisagenlecleucel for adult patients with relapsed or refractory large B-cell lymphoma after two or more lines of systemic therapy in the United States. J Med Econ, 24, 458-468. |
| 15. MORADI-LAKEH, M., YAGHOUBI, M., SEITZ, P., JAVANBAKHT, M. & BROCK, E. 2021. Cost-Effectiveness of Tisagenlecleucel in Paediatric Acute Lymphoblastic Leukaemia (pALL) and Adult Diffuse Large B-Cell Lymphoma (DLBCL) in Switzerland. Adv Ther, 38, 3427-3443. |
| 16. NOWAKOWSKI, G., YOON, D. H., JOFFE, E., ZINZANI, P. L., SABATELLI, L., WALTL, E. E., ALVERO, C. G., HESS, G., RIEDELL, P., KIM, K., BRIXNER, D. & SALLES, G. 2022. ABCL-088 Subgroup Analysis in RE-MIND2: An Observational, Retrospective Cohort Study of Tafasitamab + Lenalidomide Versus Systemic Therapies in Patients With Relapsed/Refractory Diffuse Large B-Cell Lymphoma. Clinical Lymphoma, Myeloma and Leukemia, 22, S359. |
| 17. OLUWOLE, O. O., LIU, R., DIAKITE, I., FENG, C., PATEL, A., NOURHUSSEIN, I., SNIDER, J. T. & LOCKE, F. L. 2022. Cost-effectiveness of axicabtagene ciloleucel versus lisocabtagene maraleucel for adult patients with relapsed or refractory large B-cell lymphoma after two or more lines of systemic therapy in the US. J Med Econ, 25, 541-551. |
| 18. OLUWOLE, O. O., RAY, M. D., DAVIES, N., BRADFORD, R., JONES, C., PATEL, A. R. & LOCKE, F. L. 2024. Cost-effectiveness of axicabtagene ciloleucel versus tisagenlecleucel for the treatment of 3L + relapsed/refractory large B-cell lymphoma in the United States: incorporating longer survival results. J Med Econ, 27, 230-239. |
| 19. RAY, M., CASTAIGNE, J. G., ZANG, A., PATEL, A., HANCOCK, E., BRIGHTON, N. & BACHY, E. 2024. A Cost-Effectiveness Analysis of Axicabtagene Ciloleucel versus Tisagenlecleucel in the Treatment of Diffuse Large B-cell Lymphoma Based on a Real-World French Registry. Adv Ther, 41, 4282-4298. |
| 20. SHENG, K., YOU, T., ZHOU, J., WANG, Y., WU, D. & HUANG, H. 2025. Propensity Score-Matched analysis supports the survival benefits of combination chimeric antigen receptor T-cell therapy with autologous transplantation in relapsed or refractory diffuse large B-cell lymphoma: Insights from a real-world study in China. Transplant Cell Ther. |
| 21. TSUTSUÉ, S., MAKITA, S., ASOU, H., MATSUDA, H., YAMAURA, R. & TAYLOR, T. D. 2024. Cost-effectiveness analysis 3L of axicabtagene ciloleucel vs tisagenlecleucel and lisocabtagene maraleucel in Japan. Future Oncol, 20, 1333-1349. |
| 22. XUE, B., ZHOU, J., CHEN, X., LIU, Y., LU, H., ZHU, Z., ZHANG, W., ZHANG, L., LIANG, A., LI, P. & LUO, X. 2025. Sequential PD-1 inhibitors as consolidative therapy post-CD19 CART in relapsed/refractory NHL: a propensity score matching cohort study. Journal of Translational Medicine, 23. |
